# Supplementary material for: Quantitative NMR-Based Lipoprotein Analysis Identifies Elevated HDL-4 and Triglycerides in the Serum of Alzheimer’s Disease Patients
Source: MDPI journal article supplement (doi:10.3390/ijms232012472), 2022-10-18
Supplement: s1 [file s1]

**Table S4.** ANOVA-significant parameters based on the full cohort data, MMSE, and age values.

| Variable | p value               | FDR value             | VIP (PLS-DA) scores |
|----------|-----------------------|-----------------------|---------------------|
| MMSE***  | $2.76 \cdot 10^{-20}$ | $3.12 \cdot 10^{-18}$ | 4.0043              |
| L3CH*    | 0.046                 | 0.70051               | 2.7724              |
| L2CH*    | 0.049                 | 0.70051               | 2.4750              |
| L3PN †   | 0.058                 | 0.70051               | 2.4315              |
| L3PL †   | 0.063                 | 0.70051               | 2.0424              |
| L3AB †   | 0.067                 | 0.70051               | 2.3621              |
| L3FC †   | 0.078                 | 0.70051               | 1.6632              |
| V2FC †   | 0.083                 | 0.70051               | 2.1790              |
| V1TG †   | 0.085                 | 0.70051               | 0.8609              |
| IDTG †   | 0.089                 | 0.70051               | 0.3984              |
| H4A1 †   | 0.094                 | 0.70051               | 0.7199              |

p values: \*\*\*  $p < 0.0001$ ; \*  $p < 0.05$ ; †  $p < 0.10$ .
