# Supplementary material for: Quantitative NMR-Based Lipoprotein Analysis Identifies Elevated HDL-4 and Triglycerides in the Serum of Alzheimer’s Disease Patients
Source: MDPI journal article supplement (doi:10.3390/ijms232012472), 2022-10-18
Supplement: s1 [file s1]

**Table S3.** ANOVA-significant parameters based on the full cohort data without logarithmic normalization.

| <b>Variable</b> | <b>p value</b> | <b>FDR value</b> | <b>VIP (PLS-DA) scores</b> |
|-----------------|----------------|------------------|----------------------------|
| H4A1 †          | 0.064867       | 0.95172          | 0.5019                     |
| H4CH †          | 0.072953       | 0.95172          | 0.1032                     |
| H4FC †          | 0.07529        | 0.95172          | 0.0241                     |
| L2CH †          | 0.080319       | 0.95172          | 0.0690                     |

p values: † p < 0.10.
