# Supplementary material for: Quantitative NMR-Based Lipoprotein Analysis Identifies Elevated HDL-4 and Triglycerides in the Serum of Alzheimer’s Disease Patients
Source: MDPI journal article supplement (doi:10.3390/ijms232012472), 2022-10-18
Supplement: s1 [file s1]

**Table S7.** Volcano-significant parameters (MCI-Con) based on the full cohort data.

| <b>Variable</b> | <b>p value</b> | <b>p (FDR adjusted) value</b> | <b>VIP (oPLS-DA) scores</b> |
|-----------------|----------------|-------------------------------|-----------------------------|
| V1TG*           | 0.0377         | 0.72537                       | 1.32497                     |
| IDTG†           | 0.0633         | 0.72537                       | 1.08419                     |

p values: \*  $p < 0.05$ ; †  $p < 0.10$ .
