# Supplementary material for: Quantitative NMR-Based Lipoprotein Analysis Identifies Elevated HDL-4 and Triglycerides in the Serum of Alzheimer’s Disease Patients
Source: MDPI journal article supplement (doi:10.3390/ijms232012472), 2022-10-18
Supplement: s1 [file s1]

**Table S5.** Volcano analysis (FC > 1.20) variables based on the AD-MCI sub-cohort analysis with included CSF biomarker data and clinical metadata.

| <b>Variable</b> | <b>p value</b>        | <b>p (FDR adjusted) value</b> | <b>VIP (oPLS-DA) scores</b> |
|-----------------|-----------------------|-------------------------------|-----------------------------|
| MMSE***         | 5.70·10 <sup>-5</sup> | 0.0066148                     | 2.50638                     |
| CSF h-Tau***    | 0.92·10 <sup>-3</sup> | 0.053632                      | 3.33104                     |
| CSF p-Tau**     | 0.0015                | 0.056357                      | 3.18209                     |
| CSFAβ1-42**     | 0.0038                | 0.11092                       | 2.04571                     |
| V1CH*           | 0.0313                | 0.61622                       | 1.71706                     |
| V1TG*           | 0.0373                | 0.61622                       | 1.69412                     |
| VLPL†           | 0.0517                | 0.61622                       | 1.62185                     |
| V1PL†           | 0.0524                | 0.61622                       | 1.53238                     |
| VLFC†           | 0.0565                | 0.61622                       | 1.52974                     |
| V2FC†           | 0.0640                | 0.61622                       | 1.25871                     |
| VLTG†           | 0.0701                | 0.61622                       | 1.43322                     |
| IDTG†           | 0.0781                | 0.61622                       | 1.36563                     |
| IDPL†           | 0.0852                | 0.61622                       | 1.51304                     |
| V2PL†           | 0.0866                | 0.61622                       | 1.34341                     |
| V1FC†           | 0.0869                | 0.61622                       | 1.45258                     |
| V2TG†           | 0.0878                | 0.61622                       | 1.33780                     |
| V3FC†           | 0.0903                | 0.61622                       | 1.43120                     |

p values: \*\*\* p < 0.0001; \* p < 0.05; † p < 0.10.
