# Supplementary material for: Quantitative NMR-Based Lipoprotein Analysis Identifies Elevated HDL-4 and Triglycerides in the Serum of Alzheimer’s Disease Patients
Source: MDPI journal article supplement (doi:10.3390/ijms232012472), 2022-10-18
Supplement: s1 [file s1]

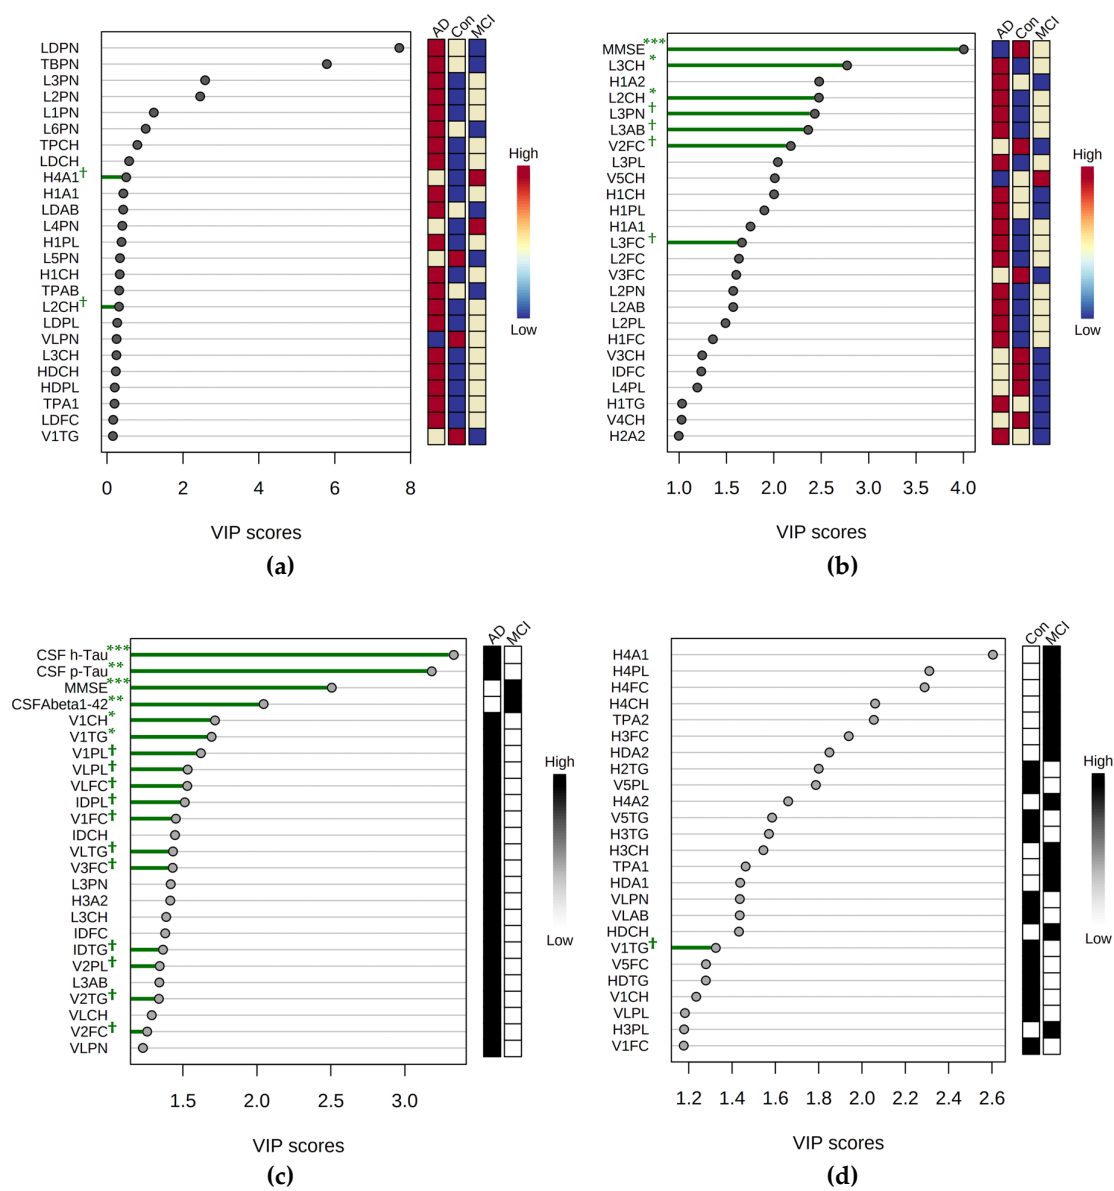

**Figure S2.** Four comparisons of top 25 lipoprotein parameters from the results of regression model analysis via PLS-DA (in color, Panel a – whole cohort direct comparison of the acquired data, Panel b – whole cohort comparison of logarithmically normalized data) and oPLS-DA (Panel c – AD-MCI patient group comparison, Panel d – MCI and controls groups comparison) applied to find lipoproteins distinguishing patient groups.
