# Supplementary material for: Quantitative NMR-Based Lipoprotein Analysis Identifies Elevated HDL-4 and Triglycerides in the Serum of Alzheimer’s Disease Patients
Source: MDPI journal article supplement (doi:10.3390/ijms232012472), 2022-10-18
Supplement: s1 [file s1]

**Table S1.** Annotation of the abbreviations used by the IVDr lipoprotein profiling analysis.

| Nr. | Name | Extended name                         | Unit   |
|-----|------|---------------------------------------|--------|
| 1   | ABA1 | Apolipoprotein-B100/Apolipoprotein-A1 | -      |
| 2   | H1A1 | Apolipoprotein-A1 HDL-1               | mg/dL  |
| 3   | H1A2 | Apolipoprotein-A2 HDL-1               | mg/dL  |
| 4   | H1CH | Cholesterol HDL-1                     | mg/dL  |
| 5   | H1FC | Free Cholesterol HDL-1                | mg/dL  |
| 6   | H1PL | Phospholipids HDL-1                   | mg/dL  |
| 7   | H1TG | Triglycerides HDL-1                   | mg/dL  |
| 8   | H2A1 | Apolipoprotein-A1 HDL-2               | mg/dL  |
| 9   | H2A2 | Apolipoprotein-A2 HDL-2               | mg/dL  |
| 10  | H2CH | Cholesterol HDL-2                     | mg/dL  |
| 11  | H2FC | Free Cholesterol HDL-2                | mg/dL  |
| 12  | H2PL | Phospholipids HDL-2                   | mg/dL  |
| 13  | H2TG | Triglycerides HDL-2                   | mg/dL  |
| 14  | H3A1 | Apolipoprotein-A1 HDL-3               | mg/dL  |
| 15  | H3A2 | Apolipoprotein-A2 HDL-3               | mg/dL  |
| 16  | H3CH | Cholesterol HDL-3                     | mg/dL  |
| 17  | H3FC | Free Cholesterol HDL-3                | mg/dL  |
| 18  | H3PL | Phospholipids HDL-3                   | mg/dL  |
| 19  | H3TG | Triglycerides HDL-3                   | mg/dL  |
| 20  | H4A1 | Apolipoprotein-A1 HDL-4               | mg/dL  |
| 21  | H4A2 | Apolipoprotein-A2 HDL-4               | mg/dL  |
| 22  | H4CH | Cholesterol HDL-4                     | mg/dL  |
| 23  | H4FC | Free Cholesterol HDL-4                | mg/dL  |
| 24  | H4PL | Phospholipids HDL-4                   | mg/dL  |
| 25  | H4TG | Triglycerides HDL-4                   | mg/dL  |
| 26  | HDA1 | HDL-Apolipoprotein-A1                 | mg/dL  |
| 27  | HDA2 | HDL-Apolipoprotein-A2                 | mg/dL  |
| 28  | HDCH | HDL-Cholesterol                       | mg/dL  |
| 29  | HDFC | HDL Free Cholesterol                  | mg/dL  |
| 30  | HDPL | HDL Phospholipids                     | mg/dL  |
| 31  | HDTG | HDL Triglycerides                     | mg/dL  |
| 32  | IDAB | IDL-Apolipoprotein-B100               | mg/dL  |
| 33  | IDCH | IDL Cholesterol                       | mg/dL  |
| 34  | IDFC | IDL Free Cholesterol                  | mg/dL  |
| 35  | IDPL | IDL Phospholipids                     | mg/dL  |
| 36  | IDPN | IDL Particle Number                   | nmol/L |
| 37  | IDTG | IDL Triglycerides                     | mg/dL  |
| 38  | L1AB | Apolipoprotein-B100 LDL-1             | mg/dL  |
| 39  | L1CH | Cholesterol LDL-1                     | mg/dL  |
| 40  | L1FC | Free Cholesterol LDL-1                | mg/dL  |
| 41  | L1PL | Phospholipids LDL-1                   | mg/dL  |
| 42  | L1PN | Particle Number LDL-1                 | nmol/L |

|    |      |                                                                   |        |
|----|------|-------------------------------------------------------------------|--------|
| 43 | L1TG | Triglycerides LDL-1                                               | mg/dL  |
| 44 | L2AB | Apolipoprotein-B100 LDL-2                                         | mg/dL  |
| 45 | L2CH | Cholesterol LDL-2                                                 | mg/dL  |
| 46 | L2FC | Free Cholesterol LDL-2                                            | mg/dL  |
| 47 | L2PL | Phospholipids LDL-2                                               | mg/dL  |
| 48 | L2PN | Particle Number LDL-2                                             | nmol/L |
| 49 | L2TG | Triglycerides LDL-2                                               | mg/dL  |
| 50 | L3AB | Apolipoprotein-B100 LDL-3                                         | mg/dL  |
| 51 | L3CH | Cholesterol LDL-3                                                 | mg/dL  |
| 52 | L3FC | Free Cholesterol LDL-3                                            | mg/dL  |
| 53 | L3PL | Phospholipids LDL-3                                               | mg/dL  |
| 54 | L3PN | Particle Number LDL-3                                             | nmol/L |
| 55 | L3TG | Triglycerides LDL-3                                               | mg/dL  |
| 56 | L4AB | Apolipoprotein-B100 LDL-4                                         | mg/dL  |
| 57 | L4CH | Cholesterol LDL-4                                                 | mg/dL  |
| 58 | L4FC | Free Cholesterol LDL-4                                            | mg/dL  |
| 59 | L4PL | Phospholipids LDL-4                                               | mg/dL  |
| 60 | L4PN | Particle Number LDL-4                                             | nmol/L |
| 61 | L4TG | Triglycerides LDL-4                                               | mg/dL  |
| 62 | L5AB | Apolipoprotein-B100 LDL-5                                         | mg/dL  |
| 63 | L5CH | Cholesterol LDL-5                                                 | mg/dL  |
| 64 | L5FC | Free Cholesterol LDL-5                                            | mg/dL  |
| 65 | L5PL | Phospholipids LDL-5                                               | mg/dL  |
| 66 | L5PN | Particle Number LDL-5                                             | nmol/L |
| 67 | L5TG | Triglycerides LDL-5                                               | mg/dL  |
| 68 | L6AB | Apolipoprotein-B100 LDL-6                                         | mg/dL  |
| 69 | L6CH | Cholesterol LDL-6                                                 | mg/dL  |
| 70 | L6FC | Free Cholesterol LDL-6                                            | mg/dL  |
| 71 | L6PL | Phospholipids LDL-6                                               | mg/dL  |
| 72 | L6PN | Particle Number LDL-6                                             | nmol/L |
| 73 | L6TG | Triglycerides LDL-6                                               | mg/dL  |
| 74 | LDAB | LDL-Apolipoprotein-B100                                           | mg/dL  |
| 75 | LDCH | LDL-Cholesterol                                                   | mg/dL  |
| 76 | LDFC | LDL Free Cholesterol                                              | mg/dL  |
| 77 | LDHD | LDL-cholesterol/HDL-cholesterol                                   | -      |
| 78 | LDPL | LDL Phospholipids                                                 | mg/dL  |
| 79 | LDPN | LDL Particle Number                                               | nmol/L |
| 80 | LDTG | LDL Triglycerides                                                 | mg/dL  |
| 81 | TBPN | Total Particle Number<br>(apolipoprotein-B100 carrying particles) | nmol/L |
| 82 | TPA1 | Total Plasma Apolipoprotein-A1                                    | mg/dL  |
| 83 | TPA2 | Total Plasma Apolipoprotein-A2                                    | mg/dL  |
| 84 | TPAB | Total Plasma Apolipoprotein-B100                                  | mg/dL  |
| 85 | TPCH | Total Plasma Cholesterol                                          | mg/dL  |
| 86 | TPTG | Total Plasma Triglycerides                                        | mg/dL  |
| 87 | V1CH | Cholesterol VLDL-1                                                | mg/dL  |

|     |      |                          |        |
|-----|------|--------------------------|--------|
| 88  | V1FC | Free Cholesterol VLDL-1  | mg/dL  |
| 89  | V1PL | Phospholipids VLDL-1     | mg/dL  |
| 90  | V1TG | Triglycerides VLDL-1     | mg/dL  |
| 91  | V2CH | Cholesterol VLDL-2       | mg/dL  |
| 92  | V2FC | Free Cholesterol VLDL-2  | mg/dL  |
| 93  | V2PL | Phospholipids VLDL-2     | mg/dL  |
| 94  | V2TG | Triglycerides VLDL-2     | mg/dL  |
| 95  | V3CH | Cholesterol VLDL-3       | mg/dL  |
| 96  | V3FC | Free Cholesterol VLDL-3  | mg/dL  |
| 97  | V3PL | Phospholipids VLDL-3     | mg/dL  |
| 98  | V3TG | Triglycerides VLDL-3     | mg/dL  |
| 99  | V4CH | Cholesterol VLDL-4       | mg/dL  |
| 100 | V4FC | Free Cholesterol VLDL-4  | mg/dL  |
| 101 | V4PL | Phospholipids VLDL-4     | mg/dL  |
| 102 | V4TG | Triglycerides VLDL-4     | mg/dL  |
| 103 | V5CH | Cholesterol VLDL-5       | mg/dL  |
| 104 | V5FC | Free Cholesterol VLDL-5  | mg/dL  |
| 105 | V5PL | Phospholipids VLDL-5     | mg/dL  |
| 106 | V5TG | Triglycerides VLDL-5     | mg/dL  |
| 107 | VLAB | VLDL-Apolipoprotein-B100 | mg/dL  |
| 108 | VLCH | VLDL Cholesterol         | mg/dL  |
| 109 | VLFC | VLDL Free Cholesterol    | mg/dL  |
| 110 | VLPL | VLDL Phospholipids       | mg/dL  |
| 111 | VLPN | VLDL Particle Number     | nmol/L |
| 112 | VLTG | VLDL Triglycerides       | mg/dL  |
