# Supplementary material for: Quantitative NMR-Based Lipoprotein Analysis Identifies Elevated HDL-4 and Triglycerides in the Serum of Alzheimer’s Disease Patients
Source: MDPI journal article supplement (doi:10.3390/ijms232012472), 2022-10-18
Supplement: s1 [file s1]

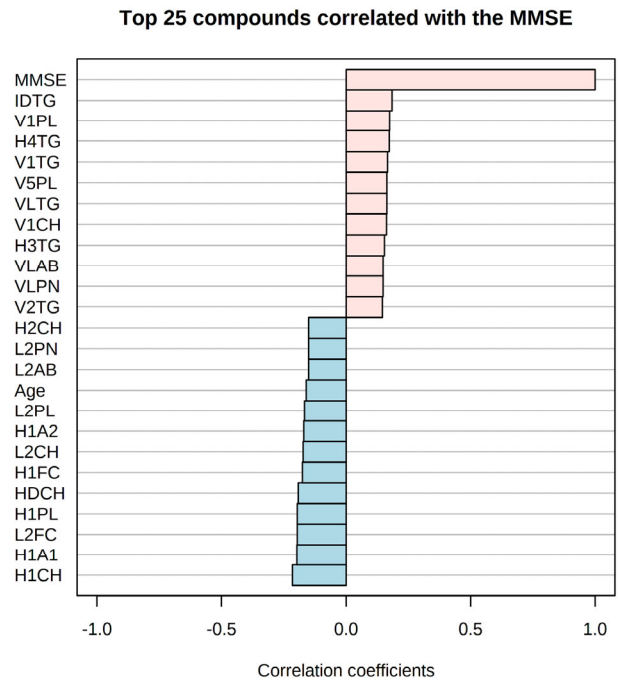

**Figure S3.** Three-group full cohort dataset comparison of top 25 Spearman correlations performed in the context of MMSE score levels and visualized via a PatternSearch plot.
